# Supplementary material for: Global manure nitrogen production and application in cropland during 1860–2014: a 5 arcmin gridded global dataset for Earth system modeling
Source: Copernicus journal article supplement (doi:10.5194/essd-9-667-2017), 2017-09-06
Supplement: Supplementary file 1 [file essd-9-667-2017-supplement.zip]

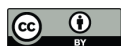

## *Supplement of*

# **Global manure nitrogen production and application in cropland during 1860–2014: a 5 arcmin gridded global dataset for Earth system modeling**

**Bowen Zhang et al.**

*Correspondence to:* Hanqin Tian ([tianhan@auburn.edu](mailto:tianhan@auburn.edu))

- [essd-9-667-2017-supplement-title-page.pdf](#)
- [SI.xlsx](#)

The copyright of individual parts of the supplement might differ from the CC BY 3.0 License.
